# Supplementary material
Source: publisher site journal article supplement (https://www.dovepress.com/article/485320)
Supplement: Supplementary file 1 [file get_supplementary_file.php]

**Table S1. Overall objective response according to smoking history and CTFI.**

|  | **smoking** | | **CTFI** | |
| --- | --- | --- | --- | --- |
|  | Never  (n = 6, %) | Former/current  (n = 28, %) | CTFI>90  (n = 13, %) | CTFI<90  (n= 21, %) |
| **Objective response rate (ORR)** | 2 (33) | 5 (18) | 6 (46) | 3 (14) |
| ORR (2nd line) | 1 (17) | 4 (14) | 3 (23) | 3 (28) |
| ORR (>3rd line) | 1 (17) | 1 (4) | 4 (31) | 1 (5) |
| **Disease control rate (DCR)** | 2 (33) | 14 (50) | 8 (62) | 9 (43) |
| DCR (2nd line) | 1 (17) | 5 (18) | 3 (23) | 3 (60) |
| DCR (>3rd line) | 1 (17) | 9 (32) | 5 (38) | 5 (23) |
| **Best**  **overall response** |  |  |  |  |
| CR | 0 (0) | 0 (0) | 0 (0) | 0 (0) |
| PR | 2 (6) | 5 (15) | 6 (38) | 3 (14) |
| SD | 0 (0) | 9 (26) | 2 (23) | 6 (29) |
| PD | 4 (12) | 14 (41) | 5 (38) | 12 (57) |
| NE | 0 (0) | 0 (0) | 0 (0) | 0 (0) |

Numerical values are presented as percentages (%) or medians (ranges). CR, complete response; PR, partial response; SD, stable disease; PD, progressive disease. The objective response rates (ORR) were CR and PR; Disease control rates (DCR) were CR, PR, and SD.

**Table S2. Cox proportional hazard regression for PFS**

|  | **Reference** | **Cox-regression analysis** | | |
| --- | --- | --- | --- | --- |
|  | Hazard ratio | 95% CI | P val |
| **Age** |  |  |  |  |
| <75 yr | ≥75 | 0.92 | 0.86 to 0.98 | 0.008 |
| **Sex** |  |  |  |  |
| Male | female | 5.27 | 1.54 to 21.44 | 0.01 |
| **Smoking history** |  |  |  |  |
| Never | Former/current | 0.98 | 0.94 to 1.01 | 0.174 |
| **Stages** |  |  |  |  |
| LD | ED | 0.18 | 0.04 to 0.67 | 0.01 |
| **Brain metastasis** |  |  |  |  |
| Yes | No | 0.25 | 0.01 to 0.9 | 0.06 |
| **Liver metastasis** |  |  |  |  |
| Yes | No | 8.00 | 0.10 to 0.65 | <0.01 |
| **CTFI** |  |  |  |  |
| <90 | ≥90 | 1.01 | 1.01 to 1.04 | <0.01 |
| **Line of lurbinectedin** |  |  |  |  |
| ≤2 | >2 | 0.95 | 0.60 to 1.50 | 0.83 |


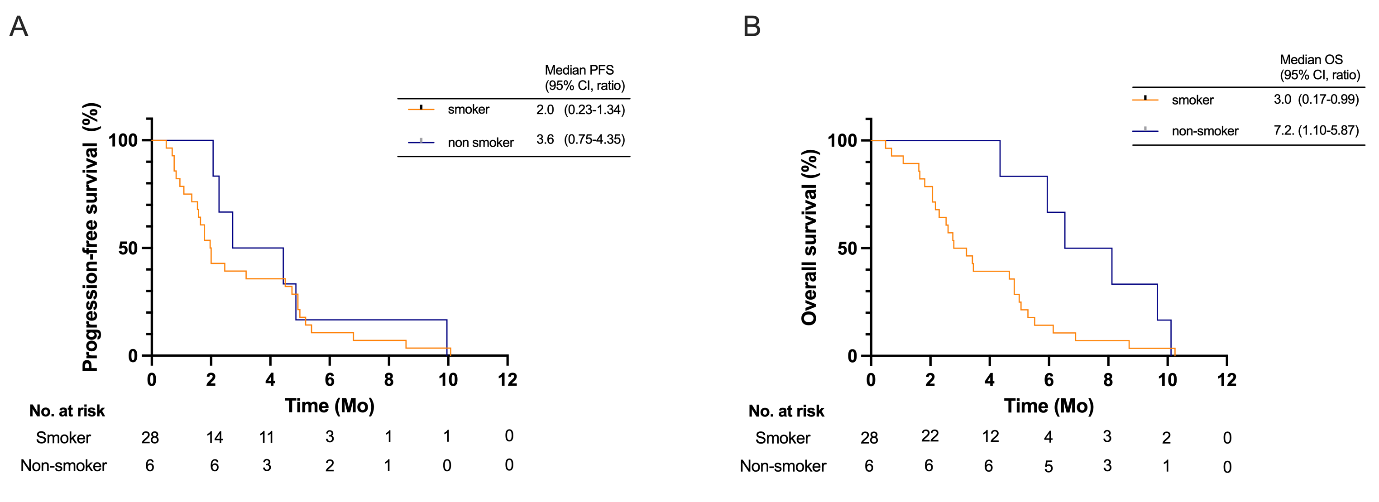


**Figure. S1.** Progression free survival (A) and overall survival (B) according to smoking history

**
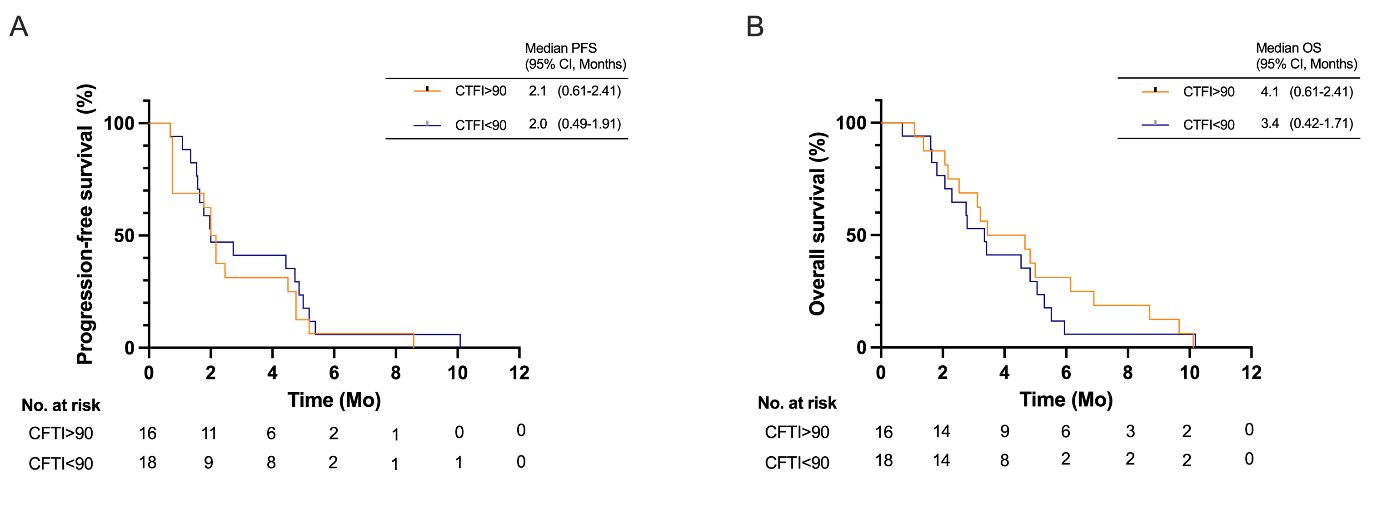
**

**Figure S2.** Progression free survival (A) and overall survival (B) according to chemotherapy free interval.
